# Supplementary material for: Phenotypic Diversity of Cryptococcus neoformans var. neoformans Clinical Isolates from Localized and Disseminated Infections
Source: MDPI journal article supplement (doi:10.3390/microorganisms10020321), 2022-01-29
Supplement: s1 [file s1]

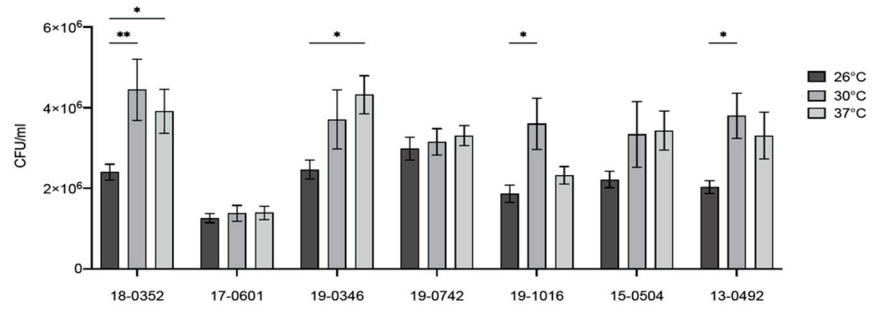

**Supplemental Figure S1.** Effect of temperature on growth of *C. neoformans* var. *neoformans*. Isolates from disseminated infections (n=3), localized soft tissue infections (n=3), or the environment (n=1). Cells were spotted in 10-fold serial dilutions (starting concentration of  $1 \times 10^6$  cells/ml) on YNB agar and incubated at 26°C, 30°C or 37°C in the dark. Cell growth was determined by counting the number of colony-forming units after incubation for 48 hours. Black lines show the standard deviations of three independent replicates with five technical replicates each. Asterisks indicate statistical significance with \*p<.05, \*\*p<.01.
